# Supplementary material
Source: PubMed Central journal article supplement (PMC6123303)
Supplement: NIHMS948025-supplement-Supp_TableS1.pdf [file NIHMS948025-supplement-Supp_TableS1.pdf]

Supplemental Table 1.

| <b><u>Gene</u></b> | <b><u>Forward Primer</u></b> | <b><u>Reverse Primer</u></b>   |
|--------------------|------------------------------|--------------------------------|
| Ms $\beta$ -actin  | TAC GTA GCC ATC CAG GCT GT   | GGA GAG CAT AGC CCT CGT AG     |
| Ms MCP1            | CTT CTG GGC CTG CTG TTC A    | CCA GCC TAC TCA TTG GGA<br>TCA |
| MS MIP2 $\alpha$   | CAC CAT ATG GCT CGG ACA CC   | TCA GGA AAA TGA CAC CTG<br>GCT |
| Ms C3              | ACT CTG TGC CCC CTG TAG TG   | TGG TCA GGG ACA TCT GTT TG     |
| Ms C5              | TAA AAC AAG GGG TGG TGA GC   | CAC CTG TCC AAG CAC TCT CA     |
| Ms C3aR            | AAG ACA TTG CCT CCA TGG TC   | GGT GAG ATG GAG GAA CCA GA     |
| Ms IL-1 $\beta$    | CAG GCA GGC AGT ATC ACT CA   | TGT CCT CAT CCT GGA AGG TC     |
| Ms TNF- $\alpha$   | ACG GCA TGG ATC TCA AAG AC   | GTG GGT GAG GAG CAC GTA GT     |
| Ms TGF- $\beta$    | CAC CTG CAA GAC CAT CGA CA   | CAC GCG GGT GAC CTC TTT AG     |
